# Supplementary material
Source: HighWire-hosted journal article supplement (http://jneurosci.org/highwire/filestream/600379/field_highwire_adjunct_files/1/fig_2.pdf)

regular  
network

small world  
network

random  
network

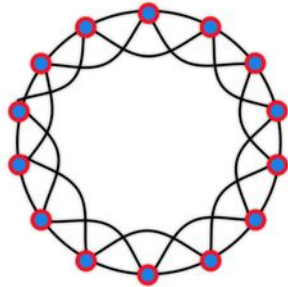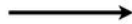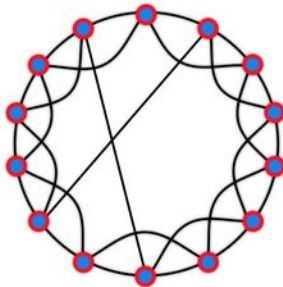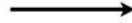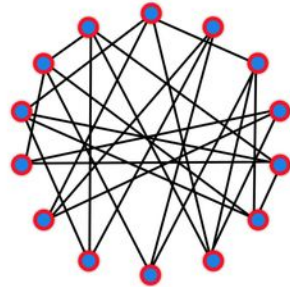

$p=0$

rewiring  $p$

$p=1$

clustering-  
coefficient  $C$

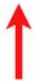

$C$

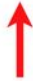

$C$

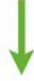

path  
length  $L$

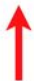

$L$

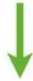

$L$

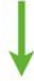

Supplement: fig_2.pdf [file fig_2.pdf]
